# Supplementary material for: Posttraumatic Stress Disorder and Risk for Early Incident Atrial Fibrillation: A Prospective Cohort Study of 1.1 Million Young Adults
Source: PubMed Central journal article supplement — J Am Heart Assoc. 2019 Sep 28;8(19):e013741. doi: 10.1161/JAHA.119.013741 (PMC6806049; doi:10.1161/jaha.119.013741), 2019-09-28
Supplement: JAH3-8-e013741-s001.pdf [file JAH3-8-e013741-s001.pdf]

# **SUPPLEMENTAL MATERIAL**

**Table S1. Characteristics of the Study Cohort According to AF Status. \***

|                                           | AF<br>(n =2,491) | No AF<br>(n =985,599) |
|-------------------------------------------|------------------|-----------------------|
| <b>Demographics</b>                       |                  |                       |
| Age (years) <sup>‡</sup>                  | 37.87 ± 11.53    | 30.16 ± 9.39          |
| Male                                      | 2,391 (95.99)    | 865,579 (87.82)       |
| Race/Ethnicity                            |                  |                       |
| White/Caucasian                           | 1,618 (64.95)    | 635,495 (64.48)       |
| Black                                     | 477 (19.15)      | 155,394 (15.77)       |
| Hispanic                                  | 216 (8.67)       | 108,963 (11.06)       |
| Other                                     | 147 (5.90)       | 61,646 (6.25)         |
| Unknown                                   | 33 (1.32)        | 24,101 (2.45)         |
| Married                                   | 1,501 (64.12)    | 449,800 (50.14)       |
| <b>Cardiovascular Comorbidities</b>       |                  |                       |
| Hypertension <sup>†</sup>                 | 930 (37.33)      | 124,684 (12.65)       |
| MI <sup>†</sup>                           | 30 (1.20)        | 617 (0.06)            |
| CHF <sup>†</sup>                          | 109 (4.38)       | 963 (0.10)            |
| CAD <sup>†</sup>                          | 124 (4.98)       | 2,946 (0.30)          |
| Diabetes <sup>†</sup>                     | 199 (7.99)       | 27,518 (2.79)         |
| OSA <sup>†</sup>                          | 525 (21.08)      | 89,420 (9.07)         |
| Stroke <sup>†</sup>                       | 96 (3.85)        | 2,301 (0.23)          |
| PVD <sup>†</sup>                          | 49 (1.97)        | 1,589 (0.16)          |
| <b>CHA<sub>2</sub>DS<sub>2</sub>-VASc</b> |                  |                       |
| 0                                         | 1,369 (54.96)    | 740,313 (75.11)       |
| 1                                         | 798 (32.04)      | 214,810 (21.79)       |
| ≥2                                        | 324 (13.01)      | 30,476 (3.09)         |
| <b>Medications</b>                        |                  |                       |
| Antihypertensive therapy <sup>†</sup>     | 1,045 (41.95)    | 120,984 (12.28)       |
| SSRI/SNRI <sup>†</sup>                    | 1,033 (41.47)    | 357,966 (36.32)       |
| <b>Lifestyle factors</b>                  |                  |                       |
| Obesity                                   | 1,114 (44.72)    | 255,516 (25.92)       |
| Substance use                             |                  |                       |
| Alcohol abuse <sup>†</sup>                | 326 (13.09)      | 103,137 (10.46)       |
| Drug abuse <sup>†</sup>                   | 101 (4.05)       | 49,909 (5.06)         |
| Smoking status <sup>§</sup>               |                  |                       |
| Current                                   | 815 (37.52)      | 308,888 (42.33)       |
| Former                                    | 350 (16.11)      | 104,355 (14.30)       |
| Never                                     | 1,007 (46.36)    | 316,486 (43.37)       |
| <b>Psychiatric comorbidities</b>          |                  |                       |
| Major depression <sup>†</sup>             | 256 (10.28)      | 89,089 (9.04)         |

myocardial infarction (MI), obstructive sleep apnea (OSA), congestive heart failure (CHF), coronary artery disease (CAD), stroke (ischemic stroke/transient ischemic attacks), peripheral vascular disease (PVD), and selective serotonin reuptake inhibitors /serotonin and norepinephrine reuptake inhibitors (SSRI/SNRI). \*Data presented are N (%) unless otherwise indicated. <sup>‡</sup>Data are presented as Mean ± SD. <sup>†</sup>Data refer to diagnoses and prescriptions that occurred during the follow-up period prior to the index AF event. <sup>§</sup>Defined as positive for smoking tobacco within 180 days of baseline.

**Table S2. Results of sensitivity analysis showing hazard ratios and 95% CIs for full model with adjustment for healthcare utilization.**

|                                         | HR (95% CI)      | P Value |
|-----------------------------------------|------------------|---------|
| PTSD <sup>†</sup>                       | 1.11 (1.00-1.22) | 0.04    |
| Healthcare utilization*                 | 1.01 (1.01-1.02) | <.0001  |
| <b><i>Demographics</i></b>              |                  |         |
| Age                                     | 1.05 (1.05-1.06) | <.0001  |
| Female                                  | 0.38 (0.31-0.46) | <.0001  |
| Black                                   | 0.85 (0.76-0.94) | 0.002   |
| Hispanic                                | 0.67 (0.58-0.77) | <.0001  |
| Other                                   | 0.81 (0.69-0.96) | 0.02    |
| Unknown                                 | 0.74 (0.53-1.05) | 0.11    |
| <b><i>Clinical factors</i></b>          |                  |         |
| Hypertension <sup>†</sup>               | 2.37 (2.14-2.61) | <.0001  |
| CAD <sup>†</sup>                        | 4.46 (3.62-5.48) | <.0001  |
| MI <sup>†</sup>                         | 4.12 (2.80-6.18) | <.0001  |
| Diabetes <sup>†</sup>                   | 1.09 (0.94-1.28) | 0.27    |
| OSA <sup>†</sup>                        | 1.67 (1.50-1.85) | <.0001  |
| <b><i>Lifestyle factors</i></b>         |                  |         |
| Obesity                                 | 1.20 (1.11-1.30) | <.0001  |
| Alcohol abuse                           | 1.79 (1.57-2.05) | <.0001  |
| Drug abuse                              | 1.18 (0.95-1.47) | 0.14    |
| Current smoker                          | 0.89 (0.82-0.98) | 0.01    |
| Former smoker                           | 0.98 (0.88-1.10) | 0.78    |
| <b><i>Psychiatric comorbidities</i></b> |                  |         |
| Major depression <sup>†</sup>           | 1.09 (0.95-1.26) | 0.21    |

coronary artery disease (CAD), myocardial infarction (MI), and obstructive sleep apnea (OSA).

<sup>†</sup>Diagnoses occurred prior to the index ischemic stroke event and are time-dependent.

\*Healthcare utilization was defined as the total number of primary care visits recorded during the first two years of cohort enrollment.
